# Supplementary material
Source: Springer Nature journal article supplement (https://www.springermedizin.de/resource/supplementary/12985_2009_672_MOESM2_ESM.pdf/9608238)

A

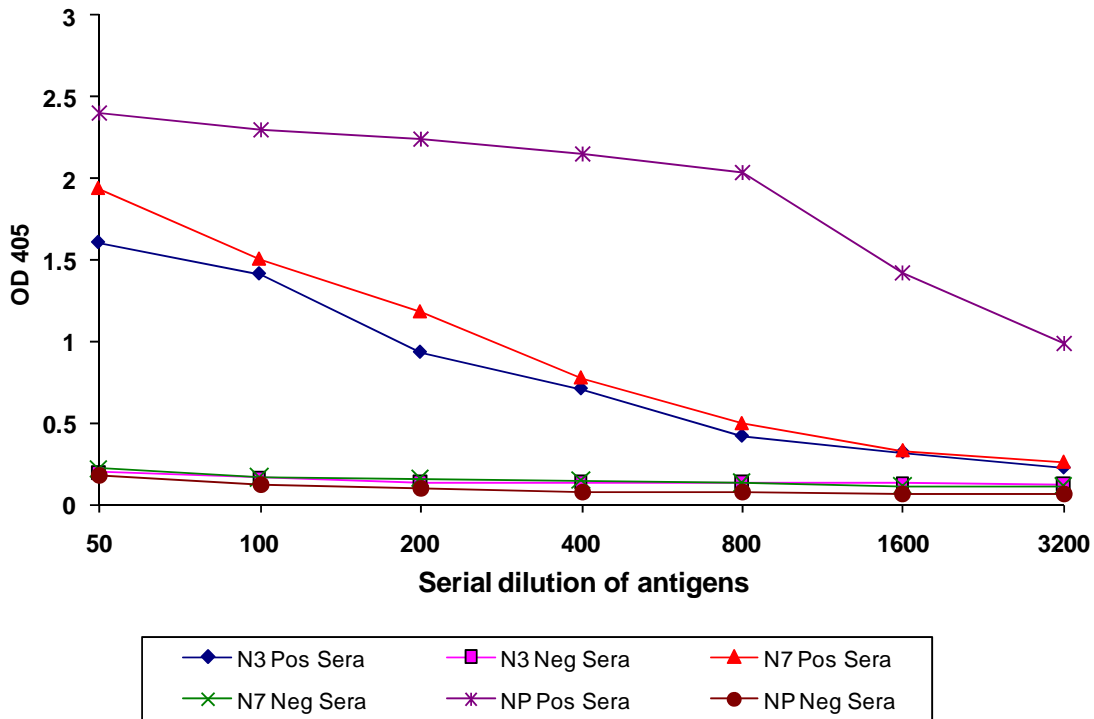

B

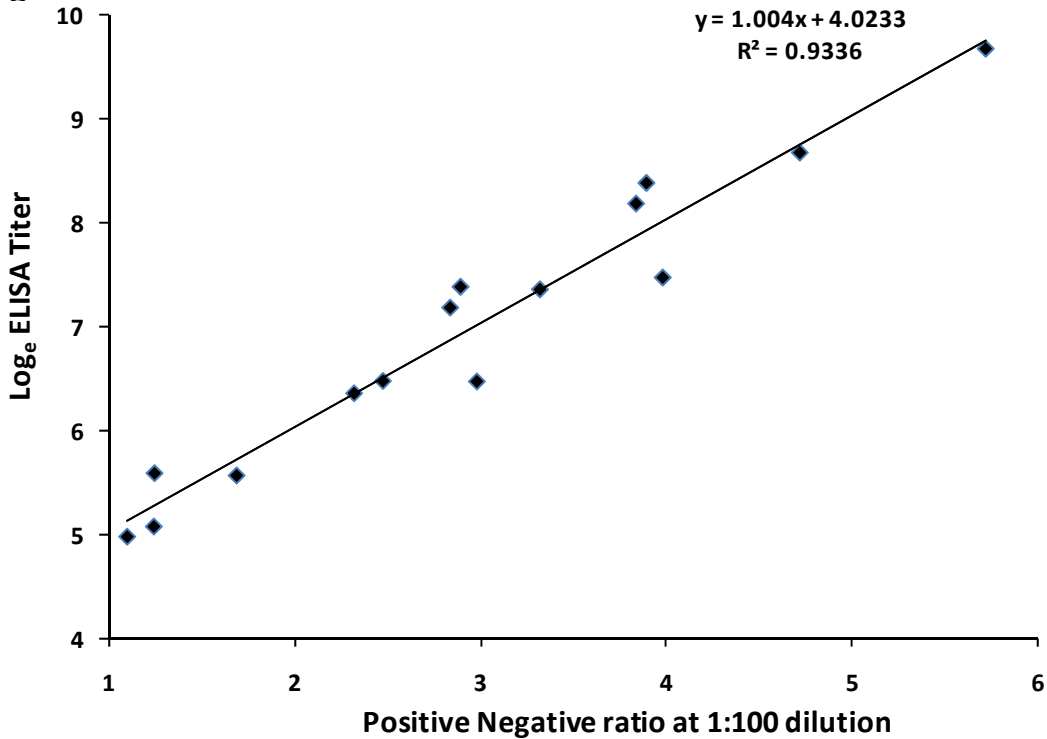

Supplement: MOESM2 [file 9608238]
